# Supplementary material for: Ethical, Legal and Social Implications of Symptom Checker Applications in Primary Health Care (CHECK.APP): Study Protocol of an Interdisciplinary Mixed-Methods Study
Source: Research Square preprint supplement (doi:10.21203/rs.3.rs-383127/v1), 2021-04-12
Supplement: Supplementary file 1 [file bdbc9573e05bcc60b540ad4b.docx]

## GRAMMS

**Applicable for the study protocol**

Good Reporting of A Mixed Methods Study (GRAMMS, 1)

| **Checklist Item** | **Reported on page** |
| --- | --- |
| (1) Describe the justification for using a mixed methods approach to the research question | **Method / Design,** p. 6-7 |
| (2) Describe the design in terms of the purpose, priority and sequence of methods | **Method / Design**, p. 7 and Figure 1 |
| (3) Describe each method in terms of sampling, data collection and analysis | **Study part 1:** p. 8  **Study part 2:** p. 9-10  **Study part 3:** p. 10-12  **Study part 4:** p. 12-13 |
| (4) Describe where integration has occurred, how it has occurred and who has participated in it | **Method / Design,** p. 6-7  **Discussion,** p. 15 |
| (5) Describe any limitation of one method associated with the present of the other method | **Strengths and limitations**, p. 15 |

## Other applied checklists during the project process

PRISMA-ScR (2), STROBE (3) and the SRQR (4) guidelines will be applied during the project process to the appropriate study parts.

PRISMA-ScR: Part 1

STROBE: Part 2

SRQR: Part 3 and 4

## Literature

1. O'Cathain A, Murphy E, Nicholl J. The quality of mixed methods studies in health services research. J of Health Serv Res Policy. 2008;13(2):92-8. Available from: https://doi.org/10.1258/jhsrp.2007.007074
2. Liberati A, Altman DG, Tetzlaff J, Mulrow C, Gøtzsche PC, Ioannidis JP, et al. The PRISMA statement for reporting systematic reviews and meta-analyses of studies that evaluate healthcare interventions: explanation and elaboration. J Clin Epidemiol. 2009;62(10): e1-e34. Available from: <https://doi.org/10.1016/j.jclinepi.2009.06.006>
3. Von Elm E, Altman DG, Egger M, Pocock SJ, Gøtzsche PC, Vandenbroucke JP, et al. The Strengthening the Reporting of Observational Studies in Epidemiology (STROBE) Statement: Guidelines for reporting observational studies. Int J Surg. 2014;12(12):1495-9. Available from: https://doi.org/10.1016/j.ijsu.2014.07.013
4. O'Brien BC, Harris IB, Beckman TJ, Reed DA, Cook DA. Standards for Reporting Qualitative Research. Acad Med. 2014;89(9):1245-51. Available from: https://doi.org/10.1097/ACM.0000000000000388
